# Supplementary material for: Unsupervised machine learning reveals key immune cell subsets in COVID-19, rhinovirus infection, and cancer therapy
Source: eLife. 2021 Aug 5;10:e64653. doi: 10.7554/eLife.64653 (PMC8370768; doi:10.7554/eLife.64653)
Supplement: Supplementary file 1. — Day compared indicates the actual day a sample was taken relative to a day 0 comparison in all cases. # cells indicates the number of cells in each percentile grouping (e.g., [0,5] indicates the number of cells whose k-nearest neighbors [KNN] area had ≤5% change in Tracking Responders EXpanding [T-REX] analysis). Change magnitude and direction are as in Figure 6A. [file elife-64653-supp1.xlsx]

## Sheet: Sheet1
	Supplementary File 1 - Direction and degree of change for all samples as in Barone et al. Figure 6*
	Sample ID	Disease at day 0	Sample source	Population analyzed	Total cells	Studied intervention	Outcome	Day compared	# cells, [0,5]	# cells, [5,15]	# cells, [15,85]	# cells, [85,95]	# cells, [95,100]	# cells, total	Change magnitude	Change direction
	RV001	Healthy	PBMC	CD4+ T cells	1367492	Rhinovirus challenge	infected	7	9	885	1363363	2080	1155	1367492	0.000851193	0.984536
	RV002	Healthy	PBMC	CD4+ T cells	2481292	Rhinovirus challenge	uninfected	7	9	329	2480954	0	0	2481292	3.62714e-06	-1
	RV003	Healthy	PBMC	CD4+ T cells	2619256	Rhinovirus challenge	uninfected	7	0	271	2613703	3615	1667	2619256	0.00063644	1
	RV004	Healthy	PBMC	CD4+ T cells	3249182	Rhinovirus challenge	infected	7	291	4103	3243461	1316	11	3249182	9.29465e-05	-0.927152
	RV005	Healthy	PBMC	CD4+ T cells	2304592	Rhinovirus challenge	infected	7	14	879	2303653	46	0	2304592	6.07483e-06	-1
	RV006	Healthy	PBMC	CD4+ T cells	1530652	Rhinovirus challenge	infected	7	0	280	1528931	1302	139	1530652	9.0811e-05	1
	RV007	Healthy	PBMC	CD4+ T cells	1480138	Rhinovirus challenge	infected	7	6168	6858	1467017	95	0	1480138	0.00416718	-1
	RV008	Healthy	PBMC	CD4+ T cells	1156004	Rhinovirus challenge	infected	7	0	71	1154970	622	341	1156004	0.000294982	1
	COV24	COVID-19	PBMC	All cells	63426	N/A	ICU	3	3	1105	58091	3580	647	63426	0.0102482	0.990769
	COV26	COVID-19	PBMC	All cells	119448	N/A	ICU	6	4	338	111308	5389	2409	119448	0.0202013	0.996685
	COV27	COVID-19	PBMC	All cells	49006	N/A	ICU	1	12	1859	45592	1532	11	49006	0.00046933	-0.0434783
	COV29	COVID-19	PBMC	All cells	164380	N/A	ICU	4	12208	17659	113306	17287	3920	164380	0.0981141	-0.513889
	COV32	COVID-19	PBMC	All cells	320730	N/A	non ICU	6	119305	18635	51651	31496	99643	320730	0.682655	-0.0898021
	COV34	COVID-19	PBMC	All cells	496522	N/A	ICU	7	97380	70135	164237	99849	64921	496522	0.326876	-0.199993
	COV35	COVID-19	PBMC	All cells	81398	N/A	ICU	4	141	3044	74262	3341	610	81398	0.00922627	0.624501
	COV36	COVID-19	PBMC	All cells	296438	N/A	non ICU	5	5494	5497	271632	7703	6112	296438	0.0391515	0.0532483
	COV37	COVID-19	PBMC	All cells	5814	N/A	ICU	5	1839	523	977	538	1937	5814	0.649467	0.0259534
	COV39	COVID-19	PBMC	All cells	193750	N/A	ICU	4	45209	12696	88567	30561	16717	193750	0.319618	-0.460098
	COV40	COVID-19	PBMC	All cells	48366	N/A	ICU	6	347	1477	42432	3151	959	48366	0.0270024	0.468606
	COV41	COVID-19	PBMC	All cells	98228	N/A	ICU	4	15488	9468	62216	8458	2598	98228	0.184123	-0.712706
	MB004	Melanoma	PBMC	All cells	168820	α-PD immunotherapy	complete	21	4975	20025	115912	22236	5672	168820	0.0630672	0.0654645
	MB005	Melanoma	PBMC	All cells	153924	α-PD immunotherapy	complete	21	1117	1636	149069	2042	60	153924	0.00764663	-0.898046
	MB006	Melanoma	PBMC	All cells	192238	α-PD immunotherapy	progressive	35	11418	4735	172333	3476	276	192238	0.0608308	-0.952796
	MB007	Melanoma	PBMC	All cells	172480	α-PD immunotherapy	progressive	21	536	2916	168874	154	0	172480	0.00310761	-1
	MB008	Melanoma	PBMC	All cells	233194	α-PD immunotherapy	partial	21	5991	7137	211481	8094	491	233194	0.0277966	-0.848504
	MB009	Melanoma	PBMC	All cells	465224	α-PD immunotherapy	stable	21	1838	6903	455082	1401	0	465224	0.00395078	-1
	MB010	Melanoma	PBMC	All cells	393740	α-PD immunotherapy	partial	21	0	478	392391	851	20	393740	5.07949e-05	1
	MB012	Melanoma	PBMC	All cells	164728	α-PD immunotherapy	partial	21	459	6870	147120	7973	2306	164728	0.0167852	0.667993
	MB013	Melanoma	PBMC	All cells	429142	α-PD immunotherapy	partial	42	56	579	424404	3654	449	429142	0.00117677	0.778218
	MB041	Melanoma	PBMC	All cells	344624	α-PD immunotherapy	progressive	21	0	0	344611	13	0	344624	0	0
	AML001	AML	PBMC	All cells	63138	Chemotherapy	CR	5	31498	7	131	161	31341	63138	0.995264	-0.00249845	-0.00249845
	AML002	AML	PBMC	All cells	73958	Chemotherapy	CR	8	29663	5074	5134	3878	30209	73958	0.809541	0.00911945	0.00911945
	AML003	AML	PBMC	All cells	682644	Chemotherapy	PD	5	1667	48603	556652	55640	20082	682644	0.0318599	0.846706	0.846706
	AML004	AML	PBMC	All cells	340622	Chemotherapy	CR	8	139293	21982	25628	16694	137025	340622	0.811216	-0.00820793	-0.00820793
	AML007	AML	PBMC	All cells	193714	Chemotherapy	CR	8	6203	14309	144865	22967	5370	193714	0.0597427	-0.0719779	-0.0719779
	*For studied interventions and outcomes, see original manuscripts for detailed information.
