# Supplementary material for: Unsupervised machine learning reveals key immune cell subsets in COVID-19, rhinovirus infection, and cancer therapy
Source: eLife. 2021 Aug 5;10:e64653. doi: 10.7554/eLife.64653 (PMC8370768; doi:10.7554/eLife.64653)
Supplement: Supplementary file 2. — CD4+ T cell and tetramer+ cell counts per subject per day in the RV study. Frequency given as a percentage. [file elife-64653-supp2.xlsx]

## Sheet: Sheet1
Supplementary File 2 - Tetramer+ cell frequency in CD4+ T cells in RV subjects
Subject ID	Day 0: CD4+ T-cell count	Day 0: tetra+ cell count	Day 0: Tetramer Frequency (%)	Day 7: CD4+ T-cell count	Day 7: tetra+ cell count	Day 7: Tetramer Frequency (%)
RV001	683746	79	0.011554	812243	516	0.0635278
RV002	1240646	1105	0.0890665	1350072	738	0.0546638
RV003	1309628	224	0.0171041	1649110	274	0.016615
RV004	2180426	267	0.0122453	1624591	309	0.0190202
RV005	1594177	24	0.00150548	1152296	101	0.00876511
RV006	795326	57	0.00716687	994580	90	0.00904905
RV007	740069	116	0.0156742	1048928	104	0.00991488
RV008	813089	48	0.00590341	578002	64	0.0110726
