# Supplementary material for: Unsupervised machine learning reveals key immune cell subsets in COVID-19, rhinovirus infection, and cancer therapy
Source: eLife. 2021 Aug 5;10:e64653. doi: 10.7554/eLife.64653 (PMC8370768; doi:10.7554/eLife.64653)
Supplement: Supplementary file 3. — Red MEM labels denote that the hotspot is a region with ≥95% expansion, and blue MEM labels denote that the hotspot is a region with ≥95% contraction after Tracking Responders EXpanding (T-REX) analysis when comparing day 0 to day 4 (±3 days). Labels given for all cell hotspots and CD4+ T cell hotspots. [file elife-64653-supp3.xlsx]

## Sheet: All cells
	Supplementary File 3 - MEM labels for enriched features in all cell hotspots and in CD4+ T cell hotspots from COVID-19 patients in dataset 2
	All cell hotspots
	patient_id	degree_change	direction_change	DBSCAN_cluster	total_counts	Marker Enrichment Modeling (MEM) Label
	COV24	1.02482	0.990769	1	85	2401095 : ▲ CD147+6 CD99+6 CD29+5 CD38+4 CD3+3 CD49d+2 CD81+2 CD52+2 CD27+2 CD28+2 CD55+1 CD62L+1 CD56+1 CD5+1 CD4+1 ▼ None
				2	174	2402095 : ▲ CD9+5 CD29+5 CD147+4 CD99+4 IgD+1 CD55+1 CX3CR1+1 CD34+1 ▼ None
				3	157	2403095 : ▲ CD147+5 CD9+4 CD29+3 CD81+2 Siglec-8+2 CD39+2 CD55+1 CD123+1 CD24+1 CD99+1 CD8a+1 ▼ None
				4	54	2404095 : ▲ CD147+6 CD99+6 CD29+4 CD38+4 CD8a+4 CD49d+2 CD3+2 CD27+2 CD39+2 CD81+1 CD52+1 CD55+1 CD56+1 ▼ None
				5	135	2405095 : ▲ CD147+6 CD29+5 CD56+5 CD99+5 CD38+4 CD49d+2 CD81+2 CD7+2 CD52+1 CD55+1 CD8a+1 ▼ None
	COV26	2.02013	0.996685	1	1062	2601095 : ▲ CD147+6 CD99+5 CD29+4 CD38+3 CD55+2 CD14+2 CD64+1 CD56+1 CD39+1 ▼ None
				2	974	2602095 : ▲ CD9+4 CD147+4 CD81+1 CD55+1 Siglec-8+1 CD29+1 CD8a+1 ▼ None
				3	163	2603095 : ▲ CD9+7 CD29+6 CD147+5 CD99+5 CX3CR1+4 CD34+2 IgD+1 CD43+1 CD45RB+1 CD55+1 CD20+1 CD24+1 CD56+1 ▼ None
				4	58	2604095 : ▲ CD147+6 CD29+3 CD55+2 CD99+2 CD49d+1 CD52+1 CD56+1 ▼ None
				5	97	2605095 : ▲ CD38+5 CD147+5 CD123+4 CD55+2 CD99+2 CD9+1 CD62L+1 CD8a+1 ▼ None
	COV27	0.046933	-0.0434783	1	8	270105 : ▲ CD147+7 CD99+6 CD29+4 CD64+3 CD38+3 CD55+2 CD14+2 CD56+2 CD62L+1 CD39+1 CD8a+1 ▼ None
				2	4	270205 : ▲ CD99+6 CD57+4 CD147+4 CD45RA+3 CD56+3 CD29+2 CD38+2 CD43+1 CD81+1 CD8a+1 ▼ None
				3	8	2703095 : ▲ CD147+4 CD16+3 CD24+2 CD55+1 CD29+1 CD38+1 CD39+1 ▼ None
				4	2	2704095 : ▲ CD147+4 CD16+2 CD55+1 CD24+1 CD56+1 CD99+1 CD39+1 CD8a+1 ▼ None
	COV29	9.81141	-0.513889	1	11879	290105 : ▲ CD16+5 CD147+4 CD55+3 CD24+3 CD29+2 CD127+2 CD39+2 CD45+1 CD38+1 CD8a+1 ▼ None
				2	284	290205 : ▲ CD147+6 CD16+6 CD55+4 CD24+4 CD29+3 CD127+3 CD39+3 CD38+2 CD45+1 CD33+1 CD11c+1 CD43+1 CD64+1 CD62L+1 CD56+1 CD99+1 CD8a+1 ▼ None
				3	2495	2903095 : ▲ CD147+4 CD55+2 CD29+2 CD24+2 CD39+2 CD16+2 CD38+1 ▼ None
				4	192	2904095 : ▲ CD147+4 CD29+2 CD64+1 CD24+1 CD39+1 CD8a+1 ▼ None
				5	759	2905095 : ▲ CD9+4 CD147+4 Siglec-8+3 CD81+2 CD29+2 CD39+2 CD45+1 CD55+1 CD34+1 CD127+1 CD24+1 CD38+1 CD99+1 CD8a+1 ▼ None
				6	246	2906095 : ▲ CD147+6 CD9+4 CD55+3 Siglec-8+3 CD29+3 CD24+3 CD39+3 CD16+3 CD81+2 CD38+2 CD45+1 CD11c+1 CD43+1 CD34+1 CD62L+1 CD127+1 CD56+1 CD99+1 CD8a+1 ▼ None
	COV32	68.2655	-0.0898021	1	99147	320105 : ▲ CD147+5 CD55+3 CD16+3 CD29+2 CD24+2 CD39+2 CD62L+1 CD38+1 CD56+1 ▼ None
				2	5835	320205 : ▲ CD147+6 CD55+4 CD24+4 CD16+4 CD29+3 CD39+3 CD62L+2 CD45+1 CD11c+1 CD43+1 CD64+1 CD38+1 CD56+1 CD99+1 CD8a+1 ▼ None
				3	165	320305 : ▲ CD147+5 CD55+3 CD29+3 CD16+3 CD9+2 CD24+2 CD39+2 CD62L+1 CD38+1 CD56+1 CD99+1 CD8a+1 ▼ None
				4	10719	320405 : ▲ CD147+6 CD29+5 CD55+4 CD38+4 CD99+4 CD64+3 CD14+3 CD45+2 CD11c+2 CD62L+2 CD56+2 CD39+2 CD33+1 HLA-DR+1 CD49d+1 CD137+1 CD141+1 CD85j+1 ▼ None
				5	765	320505 : ▲ CD123+8 Siglec-8+8 CD127+8 CD28+8 CD43+5 CD147+5 CD55+3 CD39+3 CD16+3 CD20+2 CD29+2 CD24+2 CD62L+1 CD38+1 CD56+1 ▼ None
				6	937	320605 : ▲ CD147+7 CD55+5 CD29+5 CD38+5 CD99+4 CD16+4 CD64+3 CD14+3 CD24+3 CD39+3 CD45+2 CD11c+2 CD62L+2 CD56+2 CD33+1 HLA-DR+1 CD49d+1 CD43+1 CD52+1 CD137+1 CD141+1 CD85j+1 CD8a+1 ▼ None
				7	1014	320705 : ▲ CD147+5 CD9+4 Siglec-8+3 CD81+2 CD29+2 CD24+2 CD39+2 CD45+1 CD49d+1 CD55+1 CD34+1 CD62L+1 CD127+1 CD38+1 CD56+1 CD99+1 CD8a+1 ▼ None
				8	435	320805 : ▲ CD57+4 CD3+4 CD45RA+4 CD29+3 CD38+3 CD147+3 CD99+3 CD45+2 CD43+2 CD81+2 CD56+2 CD8a+2 CD11c+1 CD49d+1 CD52+1 CD161+1 ▼ None
				9	116	320905 : ▲ CD57+5 CD29+4 CD3+3 CD147+3 CD99+3 CD45+2 CD43+2 CD81+2 CD52+2 CD49d+1 CD38+1 CD8a+1 CD5+1 ▼ None
				2	12	3202095 : ▲ CD147+7 CD24+5 CD16+5 CD55+4 CD29+4 CD39+4 CD45+2 CD11c+2 CD38+2 CD56+2 CD43+1 CD64+1 CD9+1 CD62L+1 CD127+1 CD99+1 CD8a+1 ▼ None
				3	76142	3203095 : ▲ CD147+4 CD24+3 CD16+3 CD55+2 CD29+2 CD39+2 CD45+1 CD11c+1 CD38+1 ▼ None
				5	493	3205095 : ▲ CD123+8 Siglec-8+8 CD127+8 CD28+8 CD43+5 CD147+4 CD20+3 CD24+3 CD39+3 CD16+3 CD55+2 CD29+2 CD45+1 CD11c+1 CD9+1 ▼ None
				6	1802	3206095 : ▲ CD147+7 CD29+5 CD99+5 CD55+4 CD38+4 CD16+4 CD11c+3 CD9+3 CD14+3 CD24+3 CD39+3 CD45+2 CD64+2 CD56+2 CD33+1 HLA-DR+1 CD49d+1 CD52+1 CD137+1 CD62L+1 CD141+1 CD85j+1 CD8a+1 ▼ None
				7	1307	3207095 : ▲ CD9+5 CD147+5 CD81+3 Siglec-8+3 CD29+3 CD24+3 CD45+2 CD55+2 CD99+2 CD39+2 CD11c+1 CD52+1 CD34+1 CD38+1 CD56+1 CD8a+1 ▼ None
				8	572	3208095 : ▲ CD57+5 CD45RA+5 CD99+5 CD3+4 CD147+4 CD29+3 CD56+3 CD8a+3 CD45+2 CD43+2 CD81+2 CD38+2 CD11c+1 CD49d+1 CD52+1 CD161+1 CD7+1 ▼ None
				9	1029	3209095 : ▲ CD57+5 CD99+5 CD29+4 CD43+3 CD3+3 CD147+3 CD45+2 CD49d+2 CD81+2 CD52+2 CD45RB+1 CD45RA+1 CD56+1 CD8a+1 CD5+1 CD4+1 ▼ None
				10	294	32010095 : ▲ CD29+5 CD147+5 CD38+4 CD56+4 CD99+4 CD45+2 CD49d+2 CD81+2 CD52+2 CD43+1 CD55+1 CD161+1 CD137+1 CD62L+1 CD45RA+1 CD8a+1 CD7+1 ▼ None
				11	12291	32011095 : ▲ CD147+6 CD29+5 CD99+4 CD11c+3 CD55+3 CD9+3 CD14+3 CD38+3 CD45+2 CD64+2 CD56+2 CD39+2 CD33+1 CD137+1 CD62L+1 CD85j+1 ▼ None
				12	2093	32012095 : ▲ CD147+6 CD24+4 CD16+4 CD55+3 CD29+3 CD39+3 CD45+2 CD11c+2 CD43+1 CD9+1 CD38+1 CD56+1 CD99+1 CD8a+1 ▼ None
				13	471	32013095 : ▲ CD29+5 CD147+5 CD99+5 CD38+4 CD8a+4 CD45+3 CD49d+3 CD3+3 CD52+3 CD81+2 CD27+2 HLA-DR+1 CD43+1 CD137+1 CD56+1 CD39+1 ▼ None
				14	2290	32014095 : ▲ CD9+10 CD29+8 CD147+7 CD99+6 CD34+5 CD55+4 CD20+4 CD137+3 CD56+3 CD81+1 CX3CR1+1 CD14+1 CD161+1 CD62L+1 CD38+1 ▼ None
				15	273	32015095 : ▲ CD147+6 CD99+6 CD29+5 CD38+4 CD45+3 CD3+3 CD52+3 CD27+3 CD49d+2 CD28+2 CD43+1 CD81+1 CD55+1 CD137+1 CD62L+1 CD56+1 CD5+1 CD4+1 ▼ None
	COV34	32.6876	-0.199993	1	92331	340105 : ▲ CD147+4 CD55+3 CD24+3 CD16+3 CD29+2 CD62L+1 CD127+1 CD56+1 CD39+1 CD8a+1 ▼ None
				2	370	340205 : ▲ CD147+5 CD16+4 CD55+3 CD29+3 CD99+2 CD45+1 CD11c+1 CD49d+1 CD43+1 CD123+1 CD85j+1 CD56+1 CD8a+1 ▼ None
				3	935	340305 : ▲ CD24+5 CD147+5 CD55+4 CD16+4 CD29+2 CD45+1 CD43+1 CD62L+1 CD38+1 CD56+1 CD39+1 CD8a+1 ▼ None
				4	1762	340405 : ▲ CD147+6 CD29+5 CD55+4 CD38+4 CD99+4 CD64+3 CD14+3 CD62L+3 CD56+2 CD39+2 CD45+1 CD11c+1 CD137+1 CD141+1 CD85j+1 CD8a+1 ▼ None
				5	340	340505 : ▲ CD147+5 CD55+4 CD24+4 CD16+4 CD29+3 CD127+2 CD39+2 CD8a+2 CD45+1 CD43+1 CD64+1 CD62L+1 CD38+1 CD56+1 CD99+1 ▼ None
				7	704	340705 : ▲ CD147+4 CD55+2 CD29+2 CD24+1 CD56+1 CD99+1 CD39+1 CD8a+1 CD16+1 ▼ None
				8	907	340805 : ▲ CD38+4 CD99+4 CD29+3 CD45RA+3 CD147+3 CD57+2 CD56+2 CD45+1 CD43+1 CD81+1 CD8a+1 ▼ None
				9	11	340905 : ▲ CD57+4 CD99+4 CD29+3 CD147+3 CD8a+3 CD38+2 CD45+1 CD49d+1 CD43+1 CD3+1 CD81+1 CD52+1 CD45RA+1 CD5+1 ▼ None
				3	177	3403095 : ▲ CD147+5 CD24+4 CD16+4 CD55+3 CD29+3 CD39+2 CD45+1 CD43+1 CD64+1 CD62L+1 CD38+1 CD56+1 CD8a+1 ▼ None
				6	59047	3406095 : ▲ CD147+4 CD16+4 CD55+3 CD29+2 CD24+2 CD62L+1 CD38+1 CD56+1 CD39+1 CD8a+1 ▼ None
				8	299	3408095 : ▲ CD45RA+5 CD99+5 CD57+4 CD29+4 CD38+4 CD147+4 CD56+4 CD43+2 CD8a+2 CD45+1 CD49d+1 CD81+1 CD161+1 CD7+1 ▼ None
				9	786	3409095 : ▲ CD57+5 CD99+5 CD29+4 CD8a+4 CD147+3 CD45+2 CD43+2 CD3+2 CD81+2 CD45RA+2 CD49d+1 CD52+1 CD5+1 ▼ None
				10	893	34010095 : ▲ CD9+4 CD29+4 CD55+3 CD147+3 CD99+3 CD43+1 CD64+1 CX3CR1+1 CD34+1 CD24+1 CD56+1 ▼ None
				11	941	34011095 : ▲ CD9+4 CD147+4 CD29+3 CD81+2 CD55+2 Siglec-8+2 CD8a+2 CD45+1 CD34+1 CD127+1 CD24+1 CD38+1 CD56+1 CD99+1 CD39+1 ▼ None
				12	1338	34012095 : ▲ CD147+6 CD29+5 CD99+5 CD55+3 CD38+3 CD62L+2 CD56+2 CD45+1 CD64+1 CD14+1 CD137+1 CD141+1 CD39+1 CD8a+1 ▼ None
				13	312	34013095 : ▲ CD147+5 CD55+3 CD29+3 CD62L+2 CD24+2 CD16+2 CD38+1 CD56+1 CD99+1 CD39+1 CD8a+1 ▼ None
				14	207	34014095 : ▲ CD147+7 CD29+6 CD38+6 CD45RA+5 CD99+4 CD39+4 CD49d+3 CD43+2 CD81+2 CD62L+2 CD27+2 CD56+2 CD45+1 HLA-DR+1 CD55+1 CD137+1 CD85j+1 CD8a+1 ▼ None
				15	247	34015095 : ▲ CD147+5 CD29+3 CD24+2 CD8a+2 CD43+1 CD55+1 CD64+1 CD38+1 CD56+1 CD99+1 CD39+1 CD16+1 ▼ None
				16	342	34016095 : ▲ CD147+5 CD16+5 CD55+4 CD29+4 CD62L+3 CD24+3 CD39+2 CD8a+2 CD45+1 CD43+1 CD64+1 CD38+1 CD56+1 CD99+1 ▼ None
	COV35	0.922627	0.624501	1	36	350105 : ▲ CD147+5 CD55+3 CD62L+1 CD24+1 CD16+1 ▼ None
				2	92	350205 : ▲ CD99+5 CD45RA+4 CD57+3 CD147+2 CD56+2 CD43+1 CD29+1 CD38+1 CD8a+1 ▼ None
				3	204	3503095 : ▲ CD9+5 CD147+5 CD81+2 CD55+1 Siglec-8+1 CD29+1 CD127+1 CD24+1 CD39+1 CD8a+1 ▼ None
				4	202	3504095 : ▲ CD9+5 CD29+5 CD147+3 CD99+2 CX3CR1+1 ▼ None
				5	194	3505095 : ▲ CD9+7 CD29+6 CD147+5 CD99+4 CD55+2 CD34+2 CX3CR1+1 CD38+1 CD56+1 ▼ None
	COV36	3.91515	0.0532483	1	2378	360105 : ▲ CD147+6 CD29+5 CD55+4 CD38+4 CD14+3 CD99+3 CD45+2 CD11c+2 CD64+2 CD33+1 HLA-DR+1 CD62L+1 CD56+1 CD39+1 ▼ None
				2	2310	360205 : ▲ CD9+3 CD29+3 IgD+1 CX3CR1+1 CD24+1 CD147+1 CD99+1 ▼ None
				3	352	360305 : ▲ CD55+4 CD147+4 CD24+2 CD45+1 CD64+1 CD29+1 CD62L+1 CD39+1 CD16+1 ▼ None
				4	421	360405 : ▲ CD147+4 CD55+3 CD24+3 CD16+3 CD127+2 CD45+1 CD29+1 CD39+1 ▼ None
				1	3816	3601095 : ▲ CD147+6 CD29+5 CD99+5 CD38+3 CD45+2 CD11c+2 CD55+2 CD14+2 CD39+2 CD33+1 HLA-DR+1 CD64+1 CD9+1 CD56+1 ▼ None
				5	2152	3605095 : ▲ CD9+9 CD29+8 CD147+7 CD99+6 CD34+5 CD55+3 CD20+3 CD137+2 CD56+2 CD161+1 CD38+1 ▼ None
	COV37	64.9467	0.0259534	1	1410	370105 : ▲ CD147+4 CD55+2 CD24+1 CD16+1 ▼ None
				2	229	370205 : ▲ CD99+4 CD3+2 CD52+1 CD29+1 CD27+1 CD147+1 ▼ None
				3	113	370305 : ▲ CD38+5 CD147+3 CD99+3 CD29+1 CD45RA+1 CD56+1 ▼ None
				4	77	370405 : ▲ CD147+6 CD55+4 CD29+3 CD38+3 CD64+2 CD99+2 CD14+1 CD56+1 CD39+1 ▼ None
				5	1639	3705095 : ▲ CD147+4 CD9+3 CD81+1 Siglec-8+1 CD29+1 CD127+1 CD39+1 CD8a+1 ▼ None
				6	254	3706095 : ▲ CD9+10 CD29+9 CD147+8 CD99+7 CD34+6 CD55+5 CD20+4 CD56+4 CD137+3 CD38+2 CX3CR1+1 ▼ None
	COV39	31.9618	-0.460098	1	24346	390105 : ▲ CD147+5 CD16+5 CD55+4 CD45+1 CD64+1 CD29+1 CD62L+1 CD24+1 CD39+1 ▼ None
				2	17959	390205 : ▲ CD9+4 CD29+4 CD147+2 IgD+1 CD99+1 ▼ None
				4	1198	390405 : ▲ CD29+5 CD147+5 CD55+4 CD9+4 CD16+4 CD24+2 CD45+1 CD11c+1 IgD+1 CD64+1 CX3CR1+1 CD62L+1 CD38+1 CD99+1 CD39+1 ▼ None
				5	1173	390505 : ▲ CD147+7 CD99+5 CD29+4 CD38+4 CD55+3 CD64+3 CD45+1 CD11c+1 CD14+1 CD62L+1 CD56+1 CD39+1 ▼ None
				10	194	39010095 : ▲ CD99+6 CD29+5 CD147+5 CD45+3 CD27+3 CD3+2 CD52+2 CD38+2 CD28+2 CD49d+1 CD5+1 ▼ None
				11	222	39011095 : ▲ CD9+5 CD147+3 CD29+2 CD45+1 CD81+1 Siglec-8+1 CD39+1 ▼ None
				11	7	3901105 : ▲ CD147+4 CD9+3 CD45+1 CD81+1 CD55+1 Siglec-8+1 CD29+1 CD24+1 CD39+1 ▼ None
				3	9986	3903095 : ▲ CD147+4 CD55+1 CD29+1 CD24+1 CD16+1 ▼ None
				6	1930	3906095 : ▲ CD147+4 CD29+1 ▼ None
				7	2165	3907095 : ▲ CD147+6 CD29+4 CD11c+3 CD45+2 CD55+2 CD99+2 HLA-DR+1 CD49d+1 CD64+1 CD14+1 CD38+1 CD56+1 CD39+1 ▼ None
				8	993	3908095 : ▲ CD147+5 CD24+3 CD16+3 CD55+2 CD29+2 CD45+1 CD38+1 CD39+1 ▼ None
				9	722	3909095 : ▲ CD29+5 CD99+5 CD147+4 CD38+3 CD45+2 CD8a+2 CD49d+1 CD3+1 CD52+1 CD27+1 ▼ None
	COV40	2.70024	0.468606	1	228	400105 : ▲ CD147+6 CD55+4 CD29+4 CD38+4 CD99+3 CD64+2 CD62L+2 CD45+1 ▼ None
				2	52	400205 : ▲ CD147+8 CD38+7 CD29+6 CD39+6 CD45RA+5 CD99+5 CD27+4 CD45+2 HLA-DR+1 CD49d+1 CD81+1 CD62L+1 ▼ None
				3	748	4003095 : ▲ CX3CR1+6 CD9+6 CD29+6 CD147+3 IgD+2 CD99+2 CD33+1 CD11c+1 HLA-DR+1 CD24+1 ▼ None
				4	57	4004095 : ▲ CX3CR1+5 CD9+4 CD29+3 IgD+2 CD11c+1 CD147+1 ▼ None
				5	52	4005095 : ▲ CX3CR1+4 IgD+2 CD9+2 CD11c+1 CD29+1 ▼ None
	COV41	18.4123	-0.712706	1	10355	410105 : ▲ CD147+5 CD16+5 CD55+3 CD24+2 CD45+1 CD64+1 CD29+1 CD62L+1 CD39+1 ▼ None
				2	3930	410205 : ▲ CD9+2 CD29+2 IgD+1 CX3CR1+1 CD147+1 ▼ None
				3	493	410305 : ▲ CD24+3 CD147+3 CD55+2 CD29+1 CD62L+1 CD39+1 CD16+1 ▼ None
				4	404	410405 : ▲ CD147+5 CD55+3 CD24+2 CD16+2 CD64+1 CD29+1 CD39+1 ▼ None
				5	211	410505 : ▲ CD147+6 CD29+5 CD99+5 CD55+3 CD64+3 CD38+3 CD45+1 CD14+1 CD56+1 CD39+1 ▼ None
				6	70	410605 : ▲ CD147+5 CD55+4 CD24+3 CD16+3 CD29+2 CD45+1 CD64+1 CD62L+1 CD39+1 ▼ None
				7	1362	4107095 : ▲ CD9+5 CD147+4 CD81+2 Siglec-8+2 CD29+2 CD45+1 CD55+1 CD24+1 CD99+1 CD39+1 ▼ None
				8	876	4108095 : ▲ CD147+6 CD29+4 CD11c+3 CD45+2 CD55+2 HLA-DR+1 CD49d+1 CD64+1 CD14+1 CD38+1 CD56+1 CD99+1 CD39+1 ▼ None
				9	117	4109095 : ▲ CD147+6 CD29+5 CD99+5 CD38+4 CD45+3 CD8a+3 CD49d+2 CD3+2 CD27+2 CD81+1 CD52+1 CD55+1 CD62L+1 CD56+1 ▼ None
				10	93	41010095 : ▲ CD9+5 CD147+5 CD55+3 CD24+3 CD16+3 CD81+2 CD29+2 CD39+2 CD45+1 CD64+1 Siglec-8+1 CD38+1 CD99+1 ▼ None
	CD4+ T cell hotspots
	patient_id	degree_change	direction_change	DBSCAN_cluster	total_counts	Marker Enrichment Modeling (MEM) Label
	COV24	2.05308	1	1	81	2401095 : ▲ CD147+10 CD99+9 CD29+8 CD38+6 CD49d+4 CD3+4 CD81+2 CD52+2 CD56+2 CD28+2 CD55+1 CD137+1 CD62L+1 CD5+1 CD4+1 ▼ None
				2	1	2402095 : ▲ CD99+10 CD147+9 CD29+8 CD3+5 CD27+5 CD38+5 CD28+3 CD81+2 CD52+2 CD62L+2 CD56+2 CD5+2 CD45+1 CD43+1 CD45RB+1 CD7+1 CD4+1 ▼ None
	COV26	N/A	N/A	N/A	N/A	N/A
	COV27	N/A	N/A	N/A	N/A	N/A
	COV29	1.4642	1	1	22	2901095 : ▲ CD147+10 CD29+8 CD99+8 CD38+7 CD49d+5 CD3+5 CD39+5 CD45+4 CD81+4 CD62L+4 CD28+4 CD55+3 CD56+3 HLA-DR+2 CD52+2 CD25+2 CD137+2 CD43+1 CD161+1 CD27+1 CD8a+1 CD5+1 CD4+1 ▼ None
				2	186	2902095 : ▲ CD147+8 CD29+7 CD99+7 CD27+5 CD38+5 CD45+4 CD3+4 CD49d+3 CD52+3 CD28+3 CD81+2 CD62L+2 CD56+2 CD5+2 HLA-DR+1 CD43+1 CD55+1 CD161+1 CD137+1 CD8a+1 CD4+1 ▼ None
	COV32	23.022	-0.045	1	282	320105 : ▲ CD3+6 CD27+5 CD45RA+5 CD45+4 CD147+4 CD52+3 CD55+3 CD99+3 CD43+2 CD45RB+2 CD81+2 CD29+2 CD62L+2 CD127+2 CD38+2 CD5+2 CD28+1 CD8a+1 CD4+1 ▼ None
				2	506	320205 : ▲ CD57+6 CD29+6 CD99+6 CD43+5 CD3+5 CD147+5 CD45+4 CD45RA+4 CD81+3 CD52+3 CD49d+2 CD5+2 CD45RB+1 CD127+1 CD38+1 CD56+1 CD8a+1 CD4+1 ▼ None
				3	45	320305 : ▲ CD45+5 CD29+5 CD27+5 CD147+5 CD3+4 CD52+4 CD99+4 CD127+3 CD43+2 CD81+2 CD62L+2 CD5+2 CD45RB+1 CD55+1 CD38+1 CD28+1 CD8a+1 CD7+1 CD4+1 ▼ None
				5	73	320505 : ▲ CD29+7 CD147+5 CD99+5 CD45+4 CD43+4 CD3+4 CD81+3 CD52+3 CD127+3 CD49d+2 CD5+2 CD161+1 CD137+1 CD56+1 CD8a+1 CD4+1 ▼ None
				7	42	320705 : ▲ CD147+10 CD99+6 CD39+6 CD3+5 CD29+5 CD45+4 CD52+3 CD25+3 CD27+3 CD28+3 CD62L+2 CD38+2 CD56+2 CD5+2 CD43+1 CD55+1 CD4+1 ▼ None
				4	73	3204095 : ▲ CD99+9 CD57+8 CD29+8 CD43+6 CD147+6 CD5+5 CD45+4 CD3+4 CD81+4 CD52+4 CD49d+3 CD45RB+1 CD161+1 CD137+1 CD127+1 CD56+1 CD8a+1 CD4+1 ▼ None
				6	292	3206095 : ▲ CD99+10 CD29+9 CD147+9 CD27+7 CD45+5 CD3+5 CD52+5 CD38+5 CD49d+4 CD28+4 CD43+2 CD81+2 CD62L+2 CD56+2 CD5+2 CD4+2 CD45RB+1 CD55+1 CD161+1 CD137+1 CD127+1 CD8a+1 CD7+1 ▼ None
				8	40	3208095 : ▲ CD99+7 CD3+6 CD27+6 CD147+5 CD45+4 CD81+4 CD52+4 CD45RA+4 CD43+3 CD45RB+3 CD55+3 CD29+3 CD7+3 CD62L+2 CD38+2 CD28+2 CD5+2 CD4+2 CD49d+1 CD127+1 CD8a+1 ▼ None
				9	286	3209095 : ▲ CD99+9 CD57+8 CD29+8 CD43+6 CD147+6 CD3+5 CD56+5 CD81+4 CD52+4 CD45RA+4 CD45+3 CD49d+3 CD5+2 CD45RB+1 CD137+1 CD38+1 CD8a+1 CD4+1 ▼ None
				10	44	32010095 : ▲ CD99+9 CD57+8 CD29+8 CD147+7 CD43+5 CD45+4 CD3+4 CD81+4 CD52+4 CD49d+3 CD38+2 CD5+2 CD45RB+1 CD161+1 CD137+1 CD127+1 CD56+1 CD8a+1 CD4+1 ▼ None
				11	108	32011095 : ▲ CD45RA+8 CD99+7 CD3+6 CD27+6 CD147+5 CD45+4 CD45RB+4 CD52+4 CD43+3 CD81+3 CD55+3 CD29+3 CD38+3 CD7+3 CD62L+2 CD28+2 CD5+2 CD127+1 CD56+1 CD8a+1 CD4+1 ▼ None
				12	22	32012095 : ▲ CD99+9 CD57+8 CD29+7 CD43+6 CD45RA+6 CD3+5 CD147+5 CD81+4 CD52+4 CD45+3 CD49d+3 CD45RB+2 CD5+2 CD137+1 CD56+1 CD8a+1 CD4+1 ▼ None
	COV34	1.093	0.472	1	41	3401095 : ▲ CD99+10 CD29+9 CD27+8 CD147+6 CD127+5 CD45+4 CD43+4 CD3+4 CD52+4 CD62L+4 CD5+4 CD81+3 CD55+2 CD28+2 CD7+2 CD4+2 CD45RB+1 CD137+1 CD56+1 CD8a+1 ▼ None
				3	26	3403095 : ▲ CD29+9 CD99+9 CD27+7 CD3+6 CD147+6 CD45+4 CD52+4 CD62L+4 CD45RA+4 CD43+3 CD45RB+3 CD81+3 CD55+2 CD127+2 CD28+2 CD8a+2 CD5+2 CD7+2 CD25+1 CD161+1 CD137+1 CD56+1 CD4+1 ▼ None
				2	18	340205 : ▲ CD99+7 CD27+6 CD147+5 CD45+4 CD3+4 CD52+4 CD62L+4 CD38+3 CD43+2 CD45RB+2 CD81+2 CD55+2 CD29+2 CD127+2 CD8a+2 CD5+2 CD56+1 CD28+1 CD7+1 CD4+1 ▼ None
	COV35	N/A	N/A	N/A	N/A	N/A
	COV36	N/A	N/A	N/A	N/A	N/A
	COV37	N/A	N/A	N/A	N/A	N/A
	COV39	0.474	1	1	44	3901095 : ▲ CD29+10 CD147+10 CD99+10 CD45+6 CD49d+4 CD3+4 CD27+4 CD52+3 CD28+3 CD38+2 CD81+1 CD137+1 CD62L+1 CD56+1 CD5+1 CD4+1 ▼ None
				2	11	3902095 : ▲ CD99+10 CD29+9 CD147+8 CD45+6 CD3+4 CD49d+3 CD52+3 CD38+3 CD27+2 CD28+2 CD81+1 CD137+1 CD56+1 CD5+1 CD4+1 ▼ None
	COV40	N/A	N/A	N/A	N/A	N/A
	COV41	N/A	N/A	N/A	N/A	N/A
