# Supplementary material for: Unsupervised machine learning reveals key immune cell subsets in COVID-19, rhinovirus infection, and cancer therapy
Source: eLife. 2021 Aug 5;10:e64653. doi: 10.7554/eLife.64653 (PMC8370768; doi:10.7554/eLife.64653)
Supplement: Supplementary file 4. [file elife-64653-supp4.xlsx]

## Sheet: Sheet1
	Supplementary File 4: Fluorescent antibody panel and tetramer selection for the analysis of RV-specific CD4+ T cells
	Surface Antibody Panel					Tetramer Selection
	Fluorochrome	Marker	Clone	Vendor		Subject ID	# Tets	PE Tetramer (DRB1)	PE-CF594 Tet (DRB1)	PE-Cy5 Tetramer (DRB1)
	BB515	CD45RO	UCHL1	BD		RV001	3	RV VP2P3 (*0404)	RV VP2P25 (*1501)	RV VP1P18 (*0404)
	FITC	Dump (CD14/CD19/CD8a)	M5E2/HIB19/SK1	Biolegend		RV002	3	RV VP2P24 (*0101)	RV VP2P21 (*0301)	RV VP1P23 (*0101)
	Spark Blue 550	CD3	SK7	Biolegend		RV003	1	Empty	RV VP2P25 (*1501)	Empty
	PE	Tetramer 1	NA	NA		RV004	2	Empty	RV VP1P18 (*0404)	RV VP2P3 (*0404)
	PE-CF594	Tetramer 2	NA	NA		RV005	1	Empty	RV VP2P2 (*1101)	Empty
	PE-Cy5	Tetramer 3	NA	NA		RV006	2	Empty	RV VP1P23 (*0701)	RV VP2P26 (*0701)
	PerCP-Cy5.5	CD95	DX2	Biolegend		RV007	2	Flu HA307-319 (*1101)	RV VP2P2 (*1101)	Empty
	PE-AF700	CD25	CD25-3G10	Thermo Fisher		RV008	1	Empty	RV VP2P21 (*0301)	Empty
	PE-Cy7	CXCR5	J252D4	Biolegend
	APC	Ki-67	20Raj1	Thermo Fisher
	AF647	Tcf-1	C63D9	Cell Signaling Technologies
	APC-Cy5.5	CD38	HIT2	Thermo Fisher
	Zombie Near IR	Live/Dead	NA	Biolegend
	APC-Fire 750	CCR7	G043H7	Biolegend
	BUV 737	CD45RA	H100	BD
	BV421	CCR6	G034E3	Biolegend
	Pacific Blue	ICOS	C398.4A	Biolegend
	BD Horizon BV480	CXCR3	1C6	BD
	BV570	CD27	O323	Biolegend
	BV605	CCR5	2D7	BD
	BV650	CD4	OKT4	Biolegend
	BV711	Tbet	4B10	Biolegend
	BV750	CD127	HIL-7R-M21	BD
	BV786	PD-1	EH12.1	BD
	*For full details of rhinovirus tetramers refer to Muehling et al, JI 2016
